# Supplementary material for: Association of Online Risk Factors With Subsequent Youth Suicide-Related Behaviors in the US
Source: PubMed Central journal article supplement (PMC8453319; doi:10.1001/jamanetworkopen.2021.25860), 2021-09-20
Supplement: jamanetwopen-e2125860-s001.pdf [file jamanetwopen-e2125860-s001.pdf]

## Supplementary Online Content

Sumner SA, Ferguson B, Bason B, et al. Association of online risk factors with subsequent youth suicide-related behaviors in the US. *JAMA Netw Open*. 2021;4(9):e2125860.  
doi:10.1001/jamanetworkopen.2021.25860

**eTable.** Type and Definition of Online Risk Factors for Suicide/Self-Harm Examined

This supplementary material has been provided by the authors to give readers additional information about their work.

**eTable 1.** Type and Definition of Online Risk Factors for Suicide/Self-Harm Examined

| <b>Variable</b>                | <b>Definition</b>                                                                                                                                                                               | <b>Example Text</b>                                                                                                                                      |
|--------------------------------|-------------------------------------------------------------------------------------------------------------------------------------------------------------------------------------------------|----------------------------------------------------------------------------------------------------------------------------------------------------------|
| <b>Outcome</b>                 |                                                                                                                                                                                                 |                                                                                                                                                          |
| Severe Suicide/Self-Harm       | Statements indicating imminent or recent suicide attempts and/or self-harm by the user                                                                                                          | <i>Bye, I'm not sure you'll get this but I'm going to commit suicide today. I love you, thank you for trying to help me but I can't hang on anymore.</i> |
| <b>Potential Risk Factors</b>  |                                                                                                                                                                                                 |                                                                                                                                                          |
| Cyberbullying                  | Name-calling, gossiping, and other mean-spirited comments; hateful and/or threatening messages; can be user generated or exposure to third-party content                                        | <i>You're such a loser.</i>                                                                                                                              |
| Sexual Content                 | Sexually suggestive language or visual media; media or graphic descriptions depicting sexual acts or abuse; can be user generated or exposure to third-party content                            | <i>Send a nude pic.</i>                                                                                                                                  |
| Depression                     | User generated content classified as showing signs of ongoing negative self-esteem, intense and prolonged feelings of hopelessness and worthlessness, and suicidal ideation without stated plan | <i>I can't do anything right anymore.</i>                                                                                                                |
| Low-Severity Suicide/Self-Harm | Third-party content (viewed but not sent by the user) related to suicide or self-harm                                                                                                           | <i>It's so hard for me to go on like this. (when statement is third party content made by another and viewed by user)</i>                                |
| Drug-Related Content           | User discussion of consuming drugs and/or alcohol or viewing of third-party content related to drugs/alcohol                                                                                    | <i>Bring the weed to my house.</i>                                                                                                                       |
| Violence                       | User generated content or viewing of third-party content related to violence such as media depicting violence and/or threats of violence                                                        | <i>If I see you again, I'm going to kill you.</i>                                                                                                        |
| Hate Speech                    | Discriminatory jokes or memes; derogatory comments about race, gender, or other protected classes; comments are directed at a group rather than an individual                                   | <i>I hate Chinese people.</i>                                                                                                                            |
| Profanity                      | Use of one or more words generally deemed as profane.                                                                                                                                           | <i>F*ck off</i>                                                                                                                                          |

Note: All examples edited for anonymity.
